# Supplementary material for: Gravity-perfused airway-on-a-chip optimized for quantitative BSL-3 studies of SARS-CoV-2 infection: barrier permeability, cytokine production, immunohistochemistry, and viral load assays
Source: Royal Society of Chemistry journal article supplement (doi:10.1039/d3lc00894k), 2024-01-01

Supplementary Figure S1. Overview of all antibodies used for immunohistochemistry

| Target                                    | Class      | Host   | Isotype | Conjugate | Conc         | Vendor                    | Cat #      |
|-------------------------------------------|------------|--------|---------|-----------|--------------|---------------------------|------------|
| Acetyl- $\alpha$ -Tubulin (Lys40) (D20G3) | Monoclonal | Rabbit | IgG     | AF 647    | 1:50         | Cell Signaling Technology | 81502      |
| Mucin 5AC                                 | Polyclonal | Rabbit | IgG     |           | 5 $\mu$ g/ml | Abcam                     | ab78660    |
| CDH26                                     | Polyclonal | Rabbit | IgG     |           | 1:100        | Invitrogen                | PA5-103396 |
| VANGL1                                    | Polyclonal | Rabbit | IgG     |           | 1:100        | Invitrogen                | PA5-55231  |
| ZO-1 (1A12)                               | Monoclonal | Mouse  | IgG     | AF 488    | 1:50         | Invitrogen                | 339188     |
| Anti-Rabbit (Secondary)                   | Polyclonal | Goat   | IgG     | AF488     | 1:1000       | Invitrogen                | A-11008    |
| Anti-Mouse (Secondary)                    | Polyclonal | Goat   | IgG     | AF488     | 1:1000       | Invitrogen                | A-11001    |

**Supplementary Figure S2. Validation and introduction of immune component to airway chip.** **A)** Phase images of naïve and cytokine-activated macrophages showing the ability of the macrophages to respond to cytokine activity. **B)** To demonstrate that the CD14-positive cells were effectively turned into immune macrophages, we show that only the differentiated macrophages produce a robust secretion of TNF alpha in response to LPS (1µg/ml) as compared to undifferentiated CD14-positive cells and macrophages not exposed to LPS (N=5, p=.05). **C)** Introduction of macrophages into the vascular side of the airway chip shows that these circulating macrophages do produce significant elevation in both IL-6 and TNF alpha (N=4, p=.01).

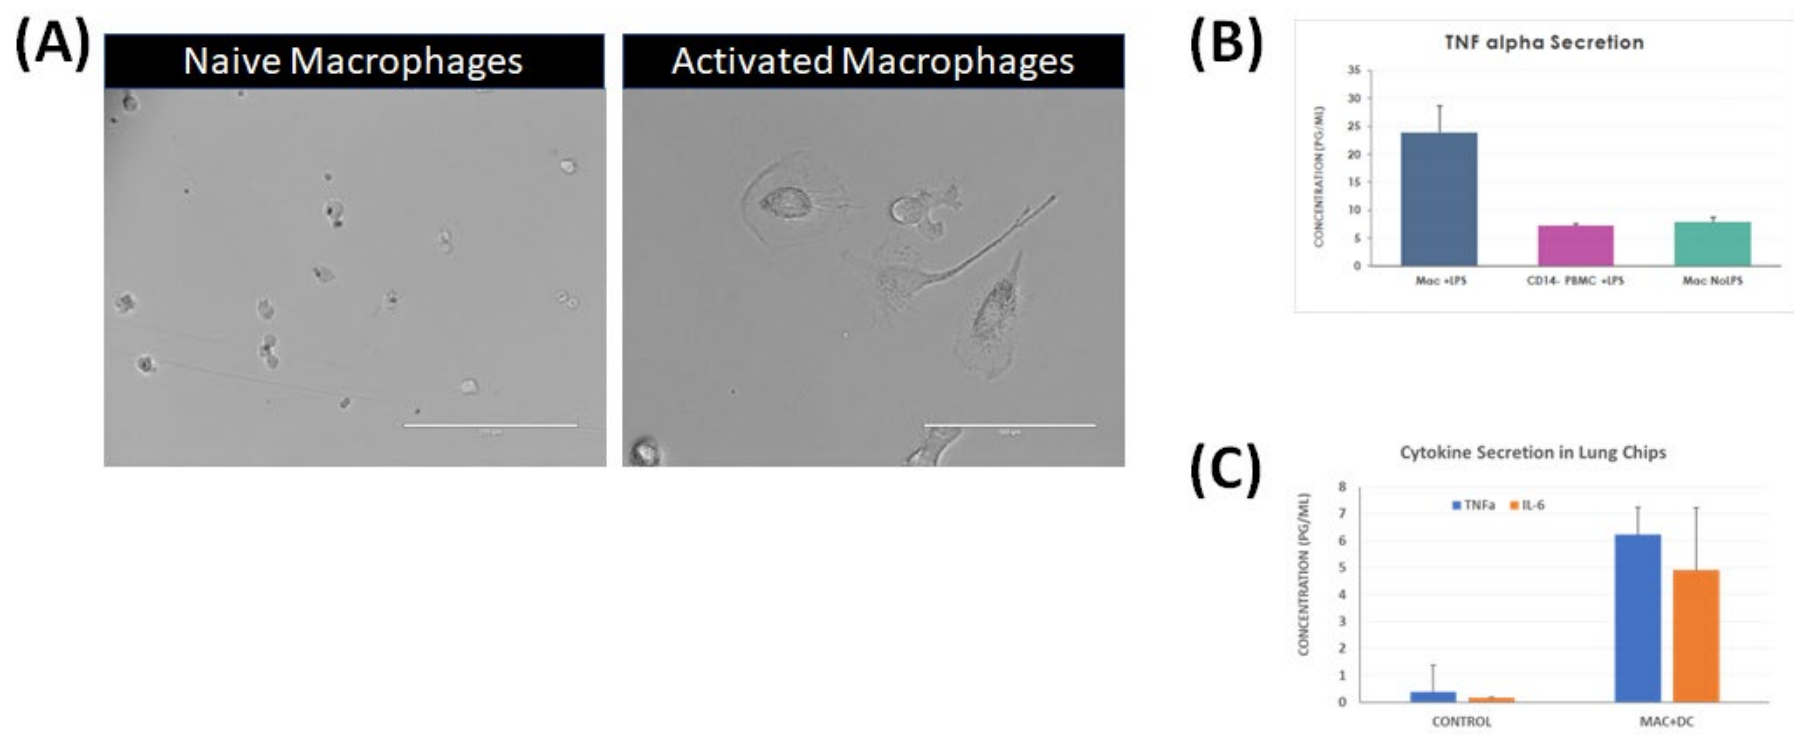

Supplement: d3lc00894k1.pdf [file d3lc00894k1.pdf]
